# Supplementary material for: Real-time measurement of fibers using an HY-differential mobility analyzer with an optical particle counter (KOFAM)
Source: PLoS One. 2017 Aug 9;12(8):e0182119. doi: 10.1371/journal.pone.0182119 (PMC5549976; doi:10.1371/journal.pone.0182119)
Supplement: S5 Table — (XLSX) [file pone.0182119.s005.xlsx]

## Sheet: Fig8
Figure 8. Length distribution according to applied voltage(serpentine type; 100-1,000V)
CHRY	Voltage (V)											unit
μm	100	200	300	400	500	600	700	800	900	1000		X-scale	Fibers
5	0	0	3	3	2	5	1	0	0	0		Y-scale	Length of fibers
6	0	0	1	0	0	0	0	0	0	0
7	1	1	1	1	0	1	0	0	1	0
8	0	2	0	2	1	1	0	0	0	0
9	0	1	0	0	0	0	0	0	0	0
10	1	1	0	1	2	0	0	1	0	0
11	0	0	0	0	0	0	0	0	0	0
12	0	0	0	2	0	0	0	0	0	0
13	0	1	0	0	1	0	0	1	1	1
14	0	0	0	0	0	1	0	0	0	0
15	2	1	0	0	2	0	0	1	0	0
16	1	0	0	0	0	0	0	0	0	0
17	0	0	0	0	0	0	0	0	0	0
18	0	0	0	0	0	0	0	0	0	1
19	0	0	0	0	0	0	0	0	0	0
20	0	0	0	0	0	0	0	1	0	0
